# Supplementary material for: Design and synthesis of 3D hierarchical NiCo2S4@MnO2 core–shell nanosheet arrays for high-performance pseudocapacitors
Source: Royal Society of Chemistry journal article supplement (doi:10.1039/c5ra05554g), 2015-01-01
Supplement: c5ra05554g1.pdf [file c5ra05554g1.pdf]

## Design and Synthesis of 3D Hierarchical NiCo<sub>2</sub>S<sub>4</sub>@MnO<sub>2</sub> Core-Shell Nanosheet Arrays for High-Performance Pseudocapacitors

Kaibing Xu<sup>ab†</sup>, Qilong Ren<sup>a†</sup>, Qian Liu<sup>a</sup>, Wenyao Li<sup>c</sup>, Rujia Zou<sup>a\*</sup>, Junqing Hu<sup>a\*</sup>

<sup>a</sup> State Key Laboratory for Modification of Chemical Fibers and Polymer Materials, College of Materials Science and Engineering, Donghua University, Shanghai, 201620, China.

<sup>b</sup> Research Center for Analysis and Measurement, Donghua University, Shanghai, 201620, China.

<sup>c</sup> School of Material Engineering, Shanghai University of Engineering Science, Shanghai 201620, China.

E-mail: rjzou@dhu.edu.cn, hu.junqing@dhu.edu.cn.

†These authors contributed equally to this work.

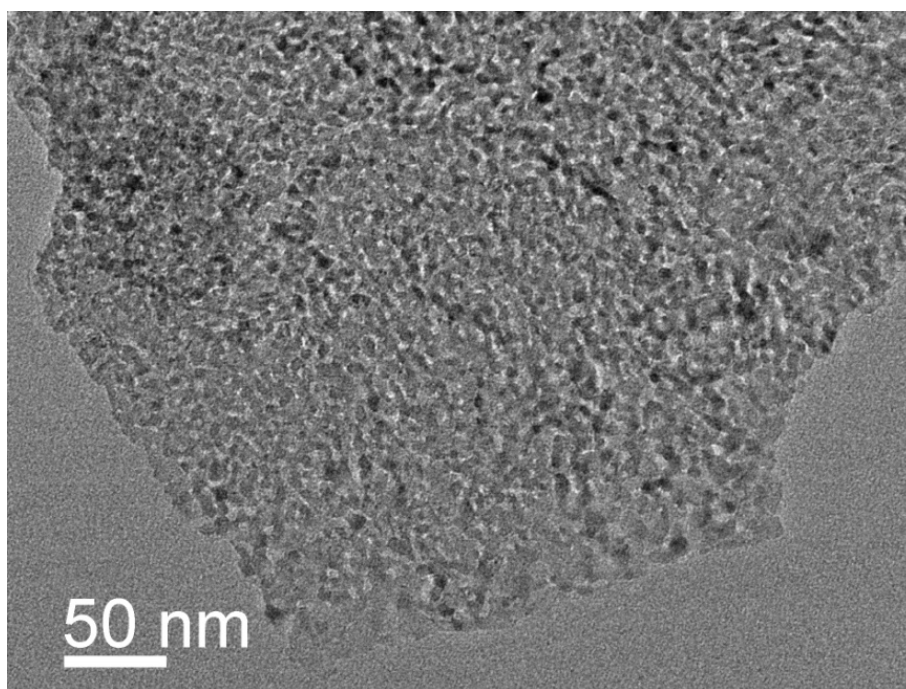

**Figure S1.** TEM image of NiCo<sub>2</sub>O<sub>4</sub> nanosheet.

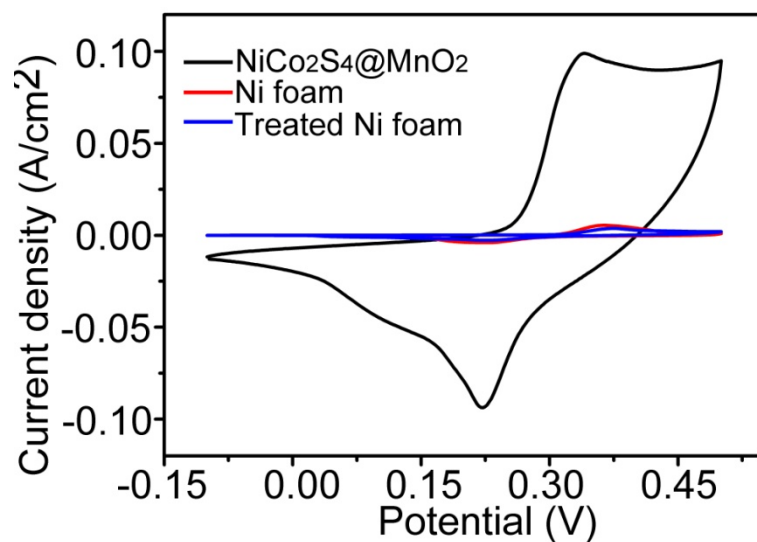

**Figure S2.** CV curve of NiCo<sub>2</sub>S<sub>4</sub>@MnO<sub>2</sub> electrode, pure and treated Ni foams electrode.

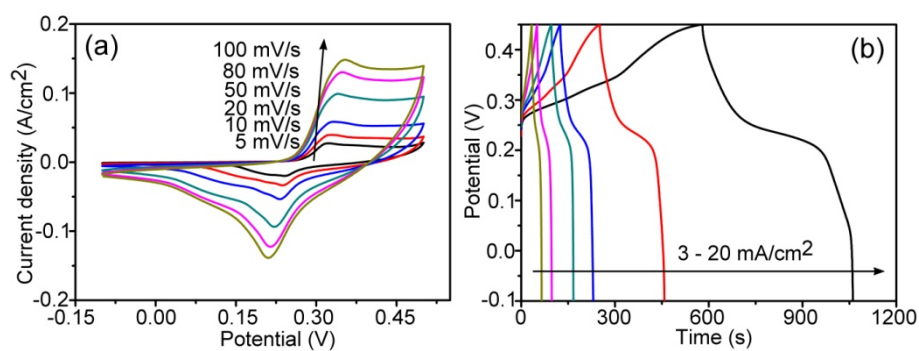

**Figure S3.** (a) CV curves and (b) CD curves of the NiCo<sub>2</sub>S<sub>4</sub>@MnO<sub>2</sub> electrode materials.

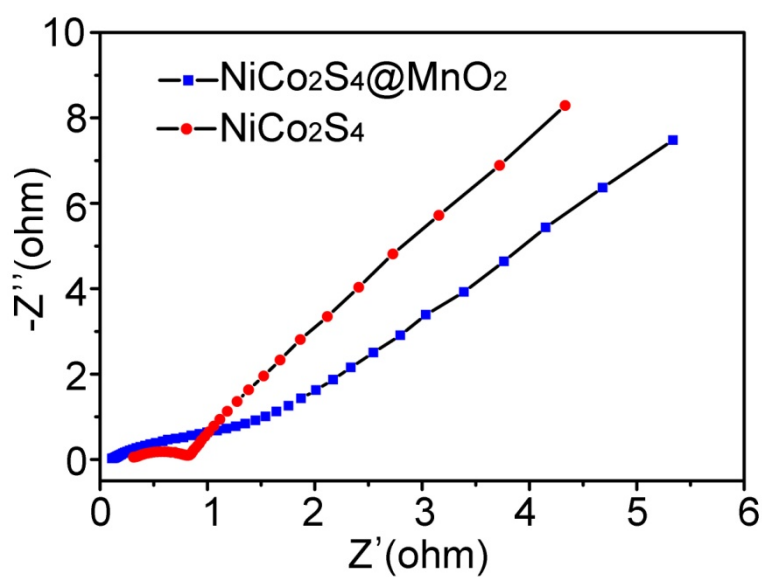

**Figure S4.** EIS spectra of the NiCo<sub>2</sub>S<sub>4</sub> and NiCo<sub>2</sub>S<sub>4</sub>@MnO<sub>2</sub> electrode.

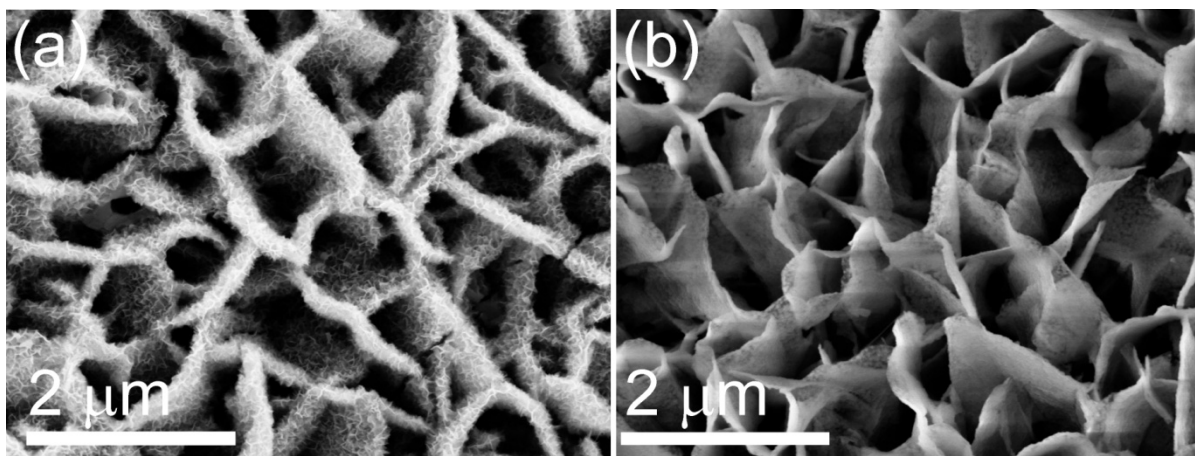

**Figure S5.** SEM image of the (a)  $\text{NiCo}_2\text{S}_4@\text{MnO}_2$  and (b)  $\text{NiCo}_2\text{S}_4$  electrode after cycling.
